# Supplementary material
Source: Royal Society of Chemistry journal article supplement (doi:10.1039/d6tb00614k)
Supplement: d6tb00614k1.pdf [file d6tb00614k1.pdf]

## Supplementary Information

**Synergistic polyphosphate–gallic acid system heals infected skin defects by remodeling immune microenvironment and restoring bioenergetics**

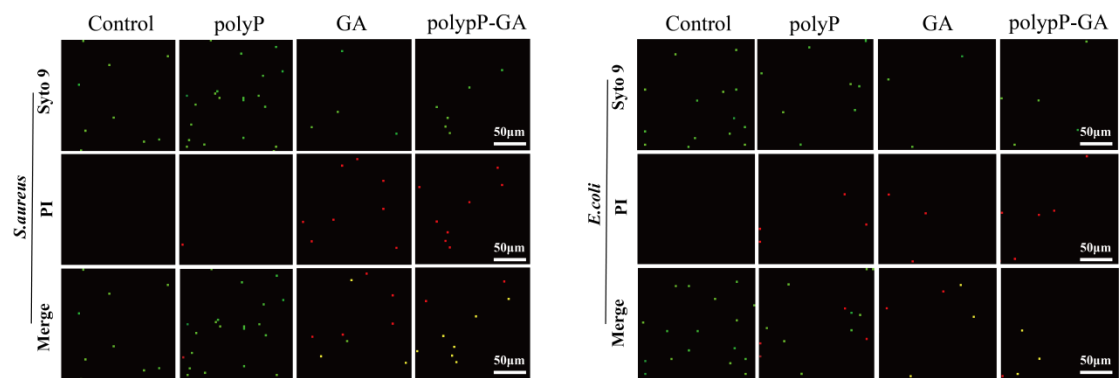

Figure S1. The effects of various treatment groups on bacterial survival status. *S. aureus* (left) and *E. coli* (right) were assessed for viability using SYTO 9/PI dual fluorescence staining. The green fluorescence emitted by SYTO 9 indicates viable bacteria, while the red fluorescence from PI signifies non-viable bacteria.

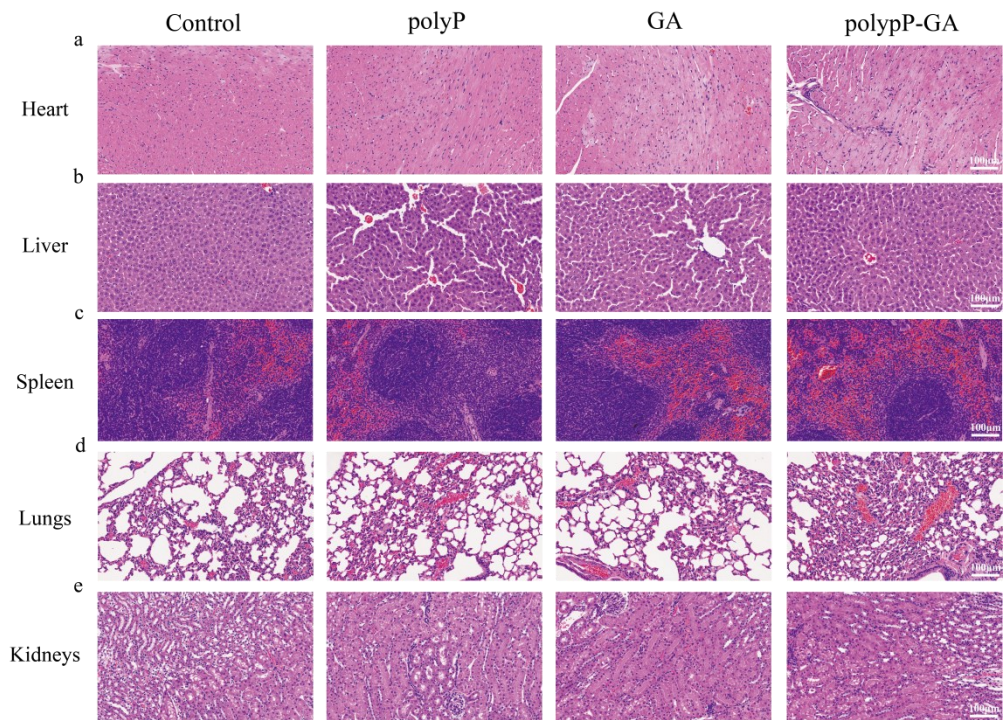

Figure S2. Representative H&E-stained sections of major organs. Scale bar: 100 µm.
